# Supplementary material for: Validation of Non-Invasive Preimplantation Genetic Screening Using a Routine IVF Laboratory Workflow
Source: MDPI journal article supplement (doi:10.3390/biomedicines10061386), 2022-06-11
Supplement: s1 [file s1]

**Table S1.** Clinical characteristics according to euploidy or aneuploidy in TE biopsy (PGT-A)

| Variables                                    | Euploidy, n=14 | Aneuploidy, n=26 | P             |
|----------------------------------------------|----------------|------------------|---------------|
| Age, yr                                      | 38.3 (2.8)     | 39.4 (1.7)       | 0.12          |
| cfDNA amount in SCM, Qubit, ng/uL            | 2.11 (1.2)     | 1.53 (1.2)       | <b>0.05</b>   |
| Insemination method, IVF, n (%)              | 10 (71%)       | 16 (62%)         | 0.73          |
| Arrest embryos, n (%)                        | 3 (21%)        | 8 (31%)          | 0.72          |
| Top-quality blastocyst <sup>1</sup> , n (%)  | 2 (18%)        | 3 (17%)          | 1.00          |
| <b>Timelapse morphokinetic time interval</b> |                |                  |               |
| Normal CC3, n (%)                            | 11 (78.6%)     | 12 (46.2%)       | <b>0.048*</b> |
| Normal CC2, n (%)                            | 11 (78.6%)     | 17 (65.4%)       | 0.385         |
| Normal T5-T2, n (%)                          | 11 (78.6%)     | 15 (57.7%)       | 0.187         |

Values are presented as Mean (SD) or n (%); SCM=spent culture medium; blastocyst<sup>1</sup>:  $\geq 3$ AA according to Gardner's grading. \*=statistically significant.

**Table S2.** Validation with embryo section algorithm

| Change selection priority, N (%)                                    | No change selection priority, N (%) |
|---------------------------------------------------------------------|-------------------------------------|
| <b>Model 1: If niPGT-A results were known in advance</b>            |                                     |
| 7 (22.6%)                                                           | 24 (77.4%)                          |
| <b>Model 2: The time-lapse morphokinetics were known in advance</b> |                                     |
| 6 (19.3%)                                                           | 25 (80.6%)                          |
| <b>Model 3: niPGT-A then morphokinetics in advance</b>              |                                     |
| 7 (22.6%)                                                           | 24 (77.4%)                          |
| <b>Model 4: Morphokinetics then niPGT-A in advance</b>              |                                     |
| 6 (19.3%)                                                           | 25 (80.6%)                          |

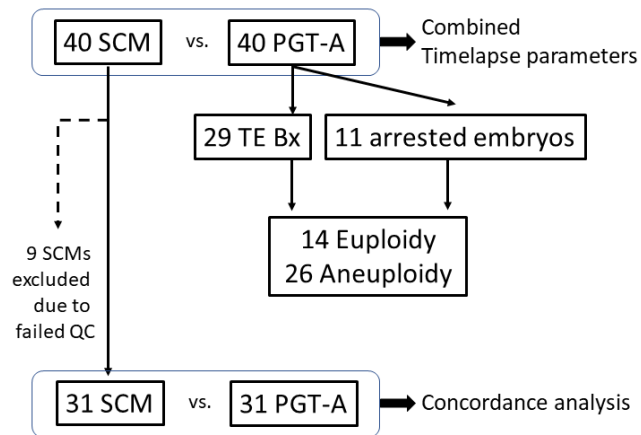**Figure S1.** Study design of concordance analysis.

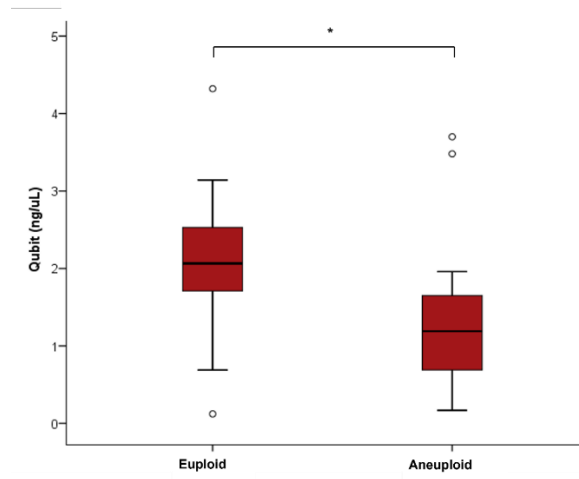

**Figure S2.** cfDNA amount in Euploid or Aneuploid embryos in maternal age  $\geq 35$  y/o. The ploidy here was according to TE/whole embryo PGT-A results. \*=statistical significance.
